# Supplementary material
Source: publisher figshare collection journal article supplement (https://gsajournals.figshare.com/ndownloader/files/12389006)
Supplement: Supplementary file 1 [file 12389006]

## Sheet: Sheet1
Table S4: GAGE statistics from QUAST for only Muller elements and the mitochondrial sequence from ISO1 release 6 contigs.
Statistic	dbg2olc	canu	qm2x	bionano	Koren et al.	miniasm
# contigs (>= 0 bp)	339	295	250	231	340	208
# contigs (>= 1000 bp)	339	295	250	231	340	208
# contigs (>= 5000 bp)	332	290	245	226	340	203
# contigs (>= 10000 bp)	290	280	235	216	339	190
# contigs (>= 25000 bp)	169	242	196	177	318	164
# contigs (>= 50000 bp)	110	186	140	121	173	122
Total length (>= 0 bp)	134109164	140720404	140153080	142817829	155249450	131856353
Total length (>= 1000 bp)	134109164	140720404	140153080	142817829	155249450	131856353
Total length (>= 5000 bp)	134085504	140700014	140132767	142797516	155249450	131838305
Total length (>= 10000 bp)	133764125	140619295	140052013	142716762	155242096	131746203
Total length (>= 25000 bp)	131794052	139931038	139341662	142006411	154810349	131269656
Total length (>= 50000 bp)	129790363	137838862	137243689	139908438	149452040	129761889
# contigs	339	295	250	231	340	208
Largest contig	13397870	14484027	25783280	28580427	25783144	16991501
Total length	134109164	140720404	140153080	142817829	155249450	131856353
Reference length	133900132	133900132	133900132	133900132	133900132	133900132
GC (%)	41.99	41.97	41.98	41.98	41.74	42.13
Reference GC (%)	42.15	42.15	42.15	42.15	42.15	42.15
N50	10113899	3004953	18923871	21305147	13340754	3866686
NG50	10113899	3276831	21305147	21305147	21708276	3866686
N75	1957513	1053116	18127341	18923871	1532388	1782891
NG75	1957513	1669674	18127341	18923871	4337326	1661785
L50	6	11	4	3	4	9
LG50	6	10	3	3	3	9
L75	14	28	5	5	14	21
LG75	14	24	5	5	7	22
# misassemblies	670	1366	1414	1366	4068	NA
# misassembled contigs	157	167	146	136	241	NA
Misassembled contigs length	126920944	116318235	131229244	135059460	147528098	NA
# local misassemblies	624	1247	1234	1193	2397	NA
# unaligned mis. contigs	35	42	41	42	76	39
# unaligned contigs	27 + 158 part	8 + 150 part	7 + 146 part	7 + 145 part	6 + 243 part	78 + 130 part
Unaligned length	2171258	2703958	2758400	5425058	8293363	131782577
Genome fraction (%)	96.693	98.531	98.442	98.446	99.195	0.05
Duplication ratio	1.019	1.046	1.042	1.042	1.106	1.104
# N's per 100 kbp	0.05	0	0	1865.84	0	0
# mismatches per 100 kbp	11.93	9.15	10.18	10.52	7.09	1685.3
# indels per 100 kbp	30.54	28.34	29.23	28.82	6.24	2126.83
Largest alignment	5143182	4253126	4253175	4253175	6493896	2412
Total aligned length	131926274	137997540	137383470	137393411	146922604	74100
NA50	805994	1190224	1108731	1082635	1349461	NA
NGA50	805994	1374634	1144089	1145231	1854886	NA
NA75	428137	458864	458957	428175	412054	NA
NGA75	428137	585941	570163	585173	821445	NA
LA50	46	34	37	38	28	NA
LGA50	46	31	34	34	21	NA
LA75	100	81	84	88	76	NA
LGA75	100	71	75	74	50	NA
Contigs #	339	295	250	231	340	208
Min contig	1632	2985	2985	2985	7354	1172
Max contig	13397870	14484027	25783280	28580427	25783144	16991501
Not corrected N50	10113899 COUNT: 6	3276831 COUNT: 10	21305147 COUNT: 3	21305147 COUNT: 3	21708276 COUNT: 3	3866686 COUNT: 9
Genome size	133900132	133900132	133900132	133900132	133900132	133900132
Assembly size	134109164	140720404	140153080	142817829	155249450	131856353
Chaff bases	0	0	0	0	0	0
Missing reference bases	1132695(0.85%)	580440(0.43%)	652080(0.49%)	652154(0.49%)	406177(0.30%)	130634296(97.56%)
Missing assembly bases	1893238(1.41%)	2012792(1.43%)	2055631(1.47%)	4720836(3.31%)	6008216(3.87%)	130668342(99.10%)
Missing assembly contigs	2(0.59%)	7(2.37%)	6(2.40%)	6(2.60%)	5(1.47%)	13(6.25%)
Duplicated reference bases	4968460	9328628	9174857	9135140	20147429	225461
Compressed reference bases	6142096	3285171	3760379	3714959	958349	2526490
Bad trim	1684171	1891714	1913232	4162489	5725119	19217670
Avg idy	99.95	99.95	99.95	99.95	99.98	95.91
Avg idy (phred scale)	33.01	33.01	33.01	33.01	36.99	13.88
SNPs	10088	8062	8681	8641	4033	13138
Indels < 5bp	48907	48832	49349	49416	8382	26090
Indels >= 5	3455	2730	3077	3084	217	1693
Inversions	74	62	59	67	30	407
Relocation	521	409	448	465	155	595
Translocation	60	36	31	31	6	2059
Corrected contig #	4211	3299	3638	3645	486	90
Corrected assembly size	128508834	131504318	131080867	131101981	133500294	129941
Min correct contig	1002	1000	1002	1002	1044	1000
Max correct contig	447525	478067	418235	418235	4180493	4203
Corrected N50	60777	88490	79686	79717	915477	NA
COUNT	594	435	467	467	43	NA
NA indicates that QUAST returned a report successfully, but returned some non informative GAGE statistics. Multiple attemts to rerun the reports also failed.
